# Supplementary material for: Evidence-based modeling of combination control on Kenyan youth HIV/AIDS dynamics
Source: PubMed Central journal article supplement (PMC7671564; doi:10.1371/journal.pone.0242491), 2020-11-17
Supplement: pone.0242491.s003.pdf [file pone.0242491.s003.pdf]

**S1 Table. Description of Single-Sex Model State variables.**

| Variable | Description                                                               |
|----------|---------------------------------------------------------------------------|
| $S_u$    | Susceptible youth who have never tested for HIV/AIDS                      |
| $S_a$    | Susceptible youth who have ever tested for HIV/AIDS                       |
| $I_u$    | Infected youth who have never tested for HIV/AIDS                         |
| $I_a$    | Infected youth who have ever tested for HIV/AIDS                          |
| $T_u$    | Infected aware youth who are not adherent to ART or consistent condom use |
| $T_a$    | Infected aware youth who are adherent to ART and use condoms consistently |
