# Supplementary material for: Evidence-based modeling of combination control on Kenyan youth HIV/AIDS dynamics
Source: PubMed Central journal article supplement (PMC7671564; doi:10.1371/journal.pone.0242491), 2020-11-17
Supplement: pone.0242491.s004.pdf [file pone.0242491.s004.pdf]

**S2 Table. Description of Single-Sex Model Parameters.**

| Parameter                    | Description                                                                      |
|------------------------------|----------------------------------------------------------------------------------|
| $\Lambda_u$                  | Natural birth and maturity rate of susceptible youth unaware of their HIV status |
| $\Lambda_a$                  | Natural birth and maturity rate of susceptible youth aware of their HIV status   |
| $\rho_{ht}$                  | Youth HIV testing rates                                                          |
| $\rho_t$                     | Youth adherence rate to anti-retroviral therapy treatment                        |
| $\rho_c$                     | Youth condom use rate                                                            |
| $\mu$                        | Natural death rate of youth respectively                                         |
| $\gamma$                     | Probability of youth transmission risk                                           |
| $\delta$                     | Disease induced deaths in youth                                                  |
| $c$                          | Youth sexual contact rate                                                        |
| $\alpha_{ht}, \alpha_{ht}^1$ | Factors negatively and positively influencing HIV testing rate among the youth   |
| $\alpha_c, \alpha_c^1$       | Factors negatively and positively influencing condom use rate among the youth    |
| $\alpha_t, \alpha_t^1$       | Factors negatively and positively influencing ART adherence rate among the youth |
| $\sigma$                     | Exit rate of youth upon turning 24 years                                         |
