# Supplementary material for: Evidence-based modeling of combination control on Kenyan youth HIV/AIDS dynamics
Source: PubMed Central journal article supplement (PMC7671564; doi:10.1371/journal.pone.0242491), 2020-11-17
Supplement: pone.0242491.s006.pdf [file pone.0242491.s006.pdf]

**S4 Table. Adjusted Parameter Values for the Single-Sex Model.**

| Parameter                               | Value                | Unit        | Source         |
|-----------------------------------------|----------------------|-------------|----------------|
| $\Lambda_u, \Lambda_a$                  | 60.476325, 100.55365 | $year^{-1}$ | Data Estimated |
| $\mu$                                   | 0.0095859            | $year^{-1}$ | Data Estimated |
| $\tilde{\gamma}$                        | 0.03022869           | $year^{-1}$ | Data Estimated |
| $\delta$                                | 0.0095               | $year^{-1}$ | Data Estimated |
| $\sigma$                                | 0.041667             | $year^{-1}$ | Calculated     |
| $\rho_{ht}$                             | 0.48                 | $year^{-1}$ | Data Estimated |
| $\rho_c$                                | 0.3                  | $year^{-1}$ | Data Estimated |
| $\rho_t$                                | 0.1                  | $year^{-1}$ | Data Estimated |
| $\alpha_{ht}, \alpha_c, \alpha_t$       | 0.4, 0.27, 0.1       | $year^{-1}$ | Estimated      |
| $\alpha_{ht}^1, \alpha_c^1, \alpha_t^1$ | 0.78, 0.8, 0.75      | $year^{-1}$ | Estimated      |
